# Supplementary material for: Metagenomic Analysis Reveals Microbial Interactions at the Biocathode of a Bioelectrochemical System Capable of Simultaneous Trichloroethylene and Cr(VI) Reduction
Source: Frontiers journal article supplement (doi:10.3389/fmicb.2021.747670), 2021-09-30
Supplement: Data_Sheet_1.PDF [file Data_Sheet_1.PDF]

# Supplementary Material

## Metagenomic analysis reveals microbial interactions at the biocathode of a bioelectrochemical system capable of simultaneous trichloroethylene and Cr(VI) reduction

Bruna Matturro<sup>1\*</sup>, Marco Zepilli<sup>2</sup>, Agnese Lai<sup>2</sup>, Mauro Majone<sup>2</sup>, Simona Rossetti<sup>1</sup>

<sup>1</sup>Water Research Institute (IRSA-CNR), Via Salaria km 29.300, 00015 Monterotondo (RM), Italy

<sup>2</sup>Department of Chemistry, Sapienza University of Rome, P.le Aldo Moro 5, 00185 Rome, Italy

\*Corresponding author: [matturro@irsa.cnr.it](mailto:matturro@irsa.cnr.it)

Table S1. Most abundant ASVs found on the biocathode of the bioelectrochemical system investigated by 16S rRNA gene amplicon sequencing.

| ASV ID | ASV SEQUENCE                      | Phylogenetic affiliation                                                                 |
|--------|-----------------------------------|------------------------------------------------------------------------------------------|
| ASV1   | 85fe11268ae72d0f1f06dc940db825c1  | Chloroflexi_Dehalococcoidia_Dehalococcoidales_Dehalococcoidaceae_Dehalococcoides         |
| ASV2   | c04da21a40b9d3bf8b736f2fe4826d47  | Deltaproteobacteria_Desulfovibrionales_Desulfovibrionaceae_Desulfovibrio                 |
| ASV 3  | b2ca34fded61ade07b3bb286aada6fc8  | Bacteroidetes_Bacteroidia_Sphingobacteriales_Lentimicrobiaceae_Lentimicrobium            |
| ASV4   | bf738ab7b8767645cceef6cf6a28af9f  | Gammaproteobacteria_Betaproteobacteriales_Rhodocyclaceae                                 |
| ASV5   | eddcc3248a0cb51954c114f4ad05a3ee  | Chloroflexi_Anaerolineae_Anaerolineales_Anaerolineaceae                                  |
| ASV6   | fe5d6129efef0233dc9768f872371d28  | Gammaproteobacteria_Betaproteobacteriales_Hydrogenophilaceae_Thiobacillus                |
| ASV7   | f4687444be39935731655f0145887ea8  | Deltaproteobacteria_Desulfovibrionales_Desulfovibrionaceae_Desulfovibrio                 |
| ASV8   | 216be078176757dbc545565e09967e03  | Deltaproteobacteria_Desulfovibrionales_Desulfovibrionaceae_Desulfovibrio                 |
| ASV9   | b837b9cd2f38ac9a09fc41da38db45ba  | Firmicutes_Clostridia_Clostridiales_Family XI_Soehngenia                                 |
| ASV10  | 75a01961e0f628db181b0af20e5d9684  | Firmicutes_Clostridia_Clostridiales_Family XI_Soehngenia                                 |
| ASV11  | f49985fedc661ea0adf74b40066e8e7f  | Firmicutes_Clostridia_Clostridiales_Family XI_Soehngenia                                 |
| ASV12  | bf5f0d3d78f22fc69bc2c1f0d4f50445  | Deltaproteobacteria_Desulfuromonadales_Desulfuromonadaceae                               |
| ASV13  | 0f8ecdcb8910220c38cff0da79399f7bf | Firmicutes_Clostridia_Clostridiales_Family XI_Soehngenia                                 |
| ASV14  | 9c19dccc11a91cba84100db612f20ec9  | Synergistetes_Synergistia_Synergistales_Synergistaceae_Thermovirga                       |
| ASV15  | 9a86fd829d0b358daa3f89e9ca8ef00a  | Deltaproteobacteria_Desulfovibrionales_Desulfovibrionaceae_Desulfovibrio                 |
| ASV16  | 1d482429446fe13dfbec86913fe48d2f  | Deltaproteobacteria_Desulfovibrionales_Desulfovibrionaceae_Desulfovibrio                 |
| ASV17  | a597cc514881f238d97c800f30603eb6  | Bacteroidetes_Bacteroidia_Bacteroidales_Dysgonomonadaceae_Petrimonas                     |
| ASV18  | d611b8a13a427110419ca8c08435f02d  | Synergistetes_Synergistia_Synergistales_Synergistaceae_Thermovirga                       |
| ASV19  | 4843600b20db9ac680b75b8a8837140c  | Bacteroidetes_Bacteroidia_Bacteroidales_Rikenellaceae                                    |
| ASV20  | facb60f9f6c79ac571937fddb45d80a   | Actinobacteria_Coriobacteriia_OPB41                                                      |
| ASV24  | f12866b5a52589408314b00c2b546060  | Alphaproteobacteria_Caulobacteriales_Caulobacteraceae_Brevundimonas                      |
| ASV27  | c44a10d45fc73b7caa1d2435738c230a  | Gammaproteobacteria_Betaproteobacteriales_Rhodocyclaceae_Dechloromonas                   |
| ASV26  | f5d0d5cbda97f9e460a7662fc8edef58  | Alphaproteobacteria_Rhizobiales_Rhizobiaceae_Ochrobactrum                                |
| ASV22  | 69c01785f8b99cd83c250b0c4b5056ff  | Chloroflexi_Anaerolineae_Anaerolineales_Anaerolineaceae                                  |
| ASV25  | d16af5d38041d3681d1dc9d1a6972f99  | Alphaproteobacteria_Caulobacteriales_Caulobacteraceae_Brevundimonas                      |
|        | a6572c9de4dcefc3c11cf5a409792e22  | Chloroflexi_Dehalococcoidia_Dehalococcoidales_Dehalococcoidaceae_Dehalococcoides (ASV23) |
|        | eb9cddb166ac93e8aec317add385a322a | Bacteroidetes_Bacteroidia_Bacteroidales_Dysgonomonadaceae_Petrimonas (ASV21)             |

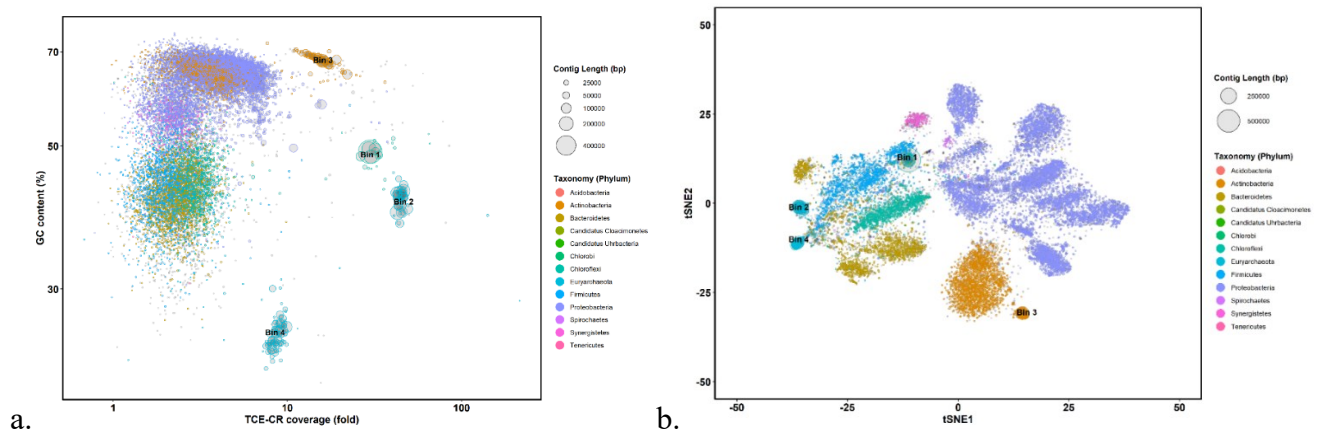

Figure S1. TCE/Cr biocathode metagenome. In plot (a), the x-axis shows the average data coverage (fold), and the y-axis shows the weighted GC-content (percentage of G and C nucleotides). Colors denote phylum-level taxonomic classification, based on the essential genes identified on the contigs. Contigs with no color either contain no essential genes or could not be assigned a phylum level classification. The size of the circles represents the length of the contigs. Plot (b) reports a Kmer-based tSNE (T-distributed Stochastic Neighbor Embedding), highlighting the extracted bins. The size of the circles represents the length of the contigs (bp). Color denotes phylum-level taxonomic classification based on the essential genes identified on the contigs.

Table S2. Classification, sequencing, and assembly statistics of each bin. Contigs, genome size (bp), GC-nucleotides contents (GC %), genome completeness, and % of contamination of each bin estimated using unique marker genes are reported. N50 = the shortest contig length needed to cover 50 % of the genome was likewise determined.

| Genome bins                                          | Genome accession | Contigs | Genome (N50) | Genome size (bp) | GC (%) | Completeness (%) | Contamination (%) |
|------------------------------------------------------|------------------|---------|--------------|------------------|--------|------------------|-------------------|
| <b>Bin1: <i>Dehalococcoides mccartyi</i></b>         | JADIIK000000000  | 23      | 203441       | 1437836          | 49%    | 99.0             | 0                 |
| <b>Bin 2: <i>Methanobacterium formicicum</i></b>     | JADIIL000000000  | 40      | 103973       | 2442285          | 41%    | 99.2             | 0                 |
| <b>Bin 3: <i>Aeromicrobium sp.</i></b>               | JADIIM000000000  | 60      | 60655        | 2072249          | 68%    | 94.6             | 1.74              |
| <b>Bin 4: <i>Methanobrevibacter arboriphilus</i></b> | JADIIN000000000  | 83      | 44031        | 2347078          | 26%    | 100              | 0.8               |

Table S3. PGAP gene annotation for each bin extracted from the TCE/Cr(VI) biocathode.

|                        | <i>Methanobrevibacter arboriphilus</i> | <i>Methanobacterium formicicum</i> | <i>Aeromicrobium sp.</i> | <i>Dehalococcoides mccartyi</i> |
|------------------------|----------------------------------------|------------------------------------|--------------------------|---------------------------------|
| Genes (total)          | 2,043                                  | 2,469                              | 2,058                    | 1,551                           |
| CDSs (total)           | 2,007                                  | 2,420                              | 2,008                    | 1,499                           |
| Genes (coding)         | 1,999                                  | 2,402                              | 2,001                    | 1,471                           |
| CDSs (with protein)    | 1,999                                  | 2,402                              | 2,001                    | 1,471                           |
| Genes (RNA)            | 36                                     | 49                                 | 50                       | 52                              |
| rRNAs                  | -                                      | 3 (5S)                             | 1, 1, 1 (5S, 16S, 23S)   | 1, 1, 1 (5S, 16S, 23S)          |
| complete rRNAs         | -                                      | 1 (5S)                             | 1, 1, 1 (5S, 16S, 23S)   | 1, 1, 1 (5S, 16S, 23S)          |
| partial rRNAs          | -                                      | 2 (5S)                             |                          |                                 |
| tRNAs                  | 34                                     | 44                                 | 43                       | 47                              |
| ncRNAs                 | 2                                      | 2                                  | 4                        | 2                               |
| Pseudo Genes (total)   | 8                                      | 18                                 | 7                        | 28                              |
| CDSs (without protein) | 8                                      | 18                                 | 7                        | 28                              |
| CRISPR Arrays          | -                                      | -                                  | 1                        | 1                               |

Table S4. A number of genes within identified Clusters of Orthologous Groups (COGs) falling into the functional categories.

|                                                                   | Dehalococcoides mccartyi<br>(JADIIK0000000000) | Aeromicrobium sp.<br>(JADIIIM0000000000) | Methanobacterium formicicum<br>(JADIIIL0000000000) | Methanobrevibacter arboriphilus<br>(JADIIIN0000000000) |
|-------------------------------------------------------------------|------------------------------------------------|------------------------------------------|----------------------------------------------------|--------------------------------------------------------|
| (J) Translation, ribosomal structure, and biogenesis              | 81                                             | 100                                      | 140                                                | 141                                                    |
| (E) Amino acid transport and metabolism                           | 64                                             | 100                                      | 61                                                 | 56                                                     |
| (C) Energy production and conversion                              | 53                                             | 65                                       | 86                                                 | 69                                                     |
| (H) Coenzyme transport and metabolism                             | 48                                             | 72                                       | 71                                                 | 59                                                     |
| (P) Inorganic ion transport and metabolism                        | 38                                             | 41                                       | 24                                                 | 10                                                     |
| (F) Nucleotide transport and metabolism                           | 30                                             | 37                                       | 29                                                 | 32                                                     |
| (L) Replication, recombination, and repair                        | 30                                             | 31                                       | 33                                                 | 34                                                     |
| (R) General function prediction only                              | 27                                             | 28                                       | 26                                                 | 26                                                     |
| (I) Lipid transport and metabolism                                | 25                                             | 31                                       | 18                                                 | 12                                                     |
| (T) Signal transduction mechanisms                                | 25                                             | 32                                       | 24                                                 | 12                                                     |
| (O) Posttranslational modification, protein turnover, chaperones  | 20                                             | 28                                       | 14                                                 | 14                                                     |
| (V) Defense mechanisms                                            | 18                                             | 21                                       | 6                                                  | 3                                                      |
| (K) Transcription                                                 | 17                                             | 34                                       | 22                                                 | 18                                                     |
| (G) Carbohydrate transport and metabolism                         | 15                                             | 33                                       | 22                                                 | 22                                                     |
| (M) Cell wall/membrane/envelope biogenesis                        | 9                                              | 48                                       | 19                                                 | 13                                                     |
| (U) Intracellular trafficking, secretion, and vesicular transport | 7                                              | 8                                        | 6                                                  | 5                                                      |
| (N) Cell Motility                                                 | 5                                              | 8                                        | 0                                                  | 0                                                      |
| (S) Function unknown                                              | 5                                              | 19                                       | 14                                                 | 14                                                     |
| (D) Cell cycle control, cell division, chromosome partitioning    | 4                                              | 13                                       | 2                                                  | 1                                                      |
| (Q) Secondary metabolites biosynthesis, transport, and catabolism | 3                                              | 3                                        | 1                                                  | 0                                                      |
| (A) RNA processing and modification                               | 0                                              | 0                                        | 1                                                  | 0                                                      |
| (B) Chromatin structure and dynamics                              | 0                                              | 0                                        | 0                                                  | 0                                                      |
| (W) Extracellular structures                                      | 0                                              | 0                                        | 0                                                  | 0                                                      |
| (X) Mobilome: prophages, transposons                              | 0                                              | 3                                        | 0                                                  | 0                                                      |

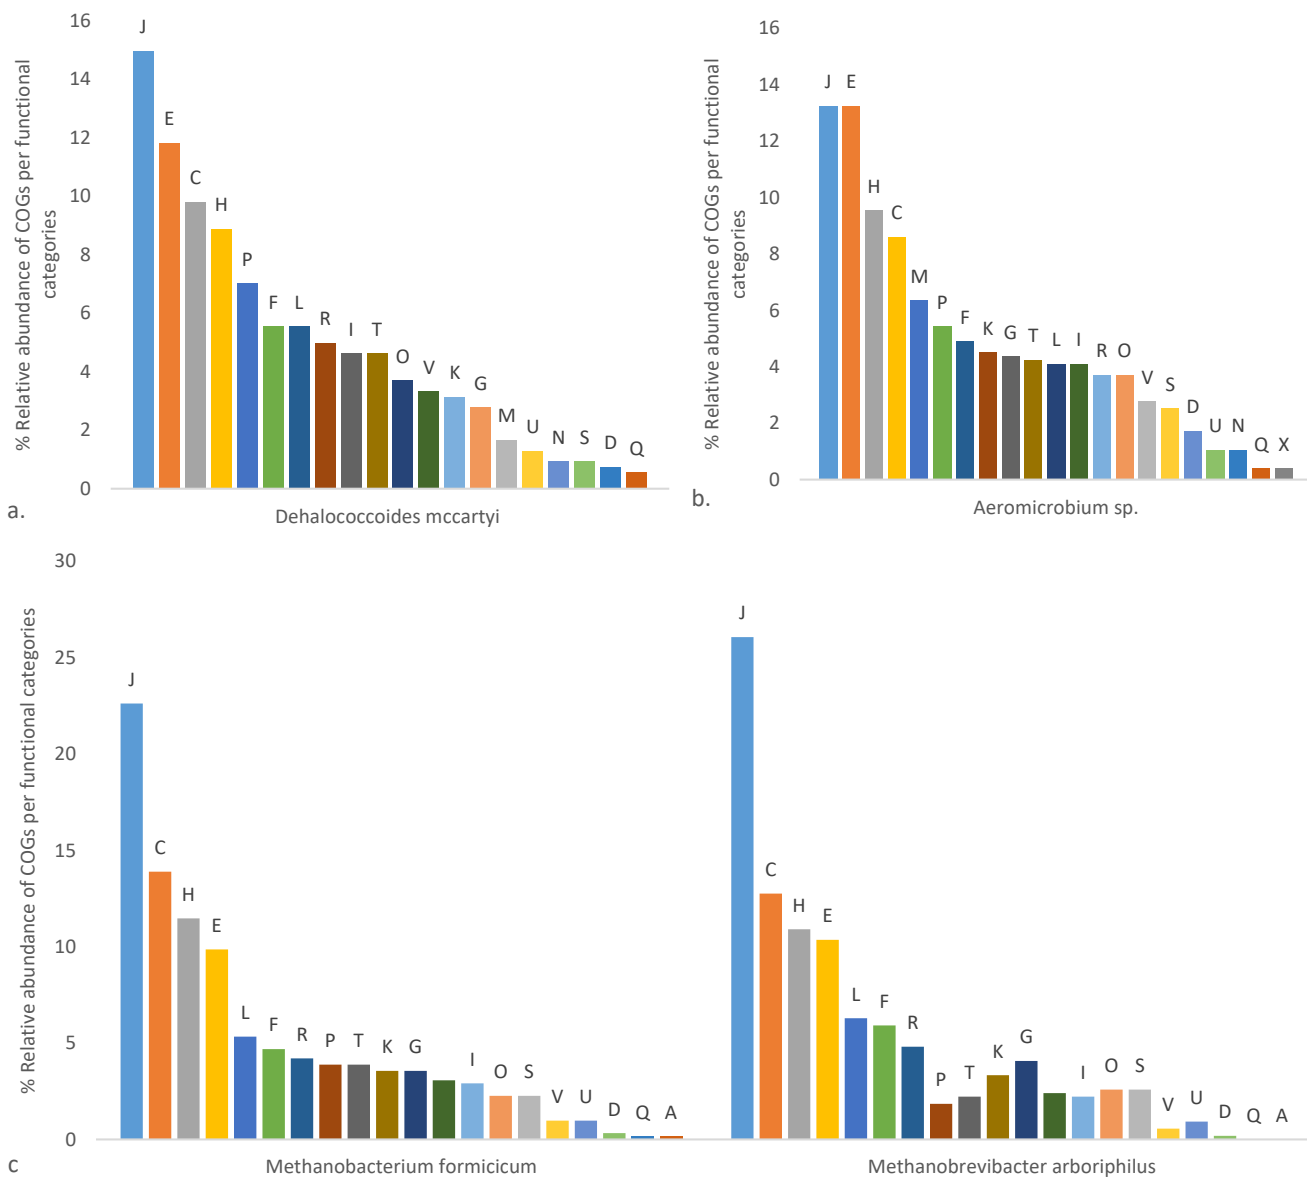

Figure S2. The total numbers of COGs per functional categories are reported for each annotated bin (a. *D.mccartyi*; b. *Aeromicrobium* sp.; c. *Methanobrevibacterium formicum*; d. *Methanobrevibacter arboriphilus*) from the whole metagenomic analysis of TCE/Cr(VI) biocathode. One-letter abbreviations for the functional categories: J, translation, including ribosome structure and biogenesis; L, replication, recombination and repair; K, transcription; O, molecular chaperones and related functions; M, cell wall structure and biogenesis and outer membrane; N, secretion, motility and chemotaxis; T, signal transduction; P, inorganic ion transport and metabolism; C, energy production and conversion; G, carbohydrate metabolism and transport; E, amino acid metabolism and transport; F, nucleotide metabolism and transport; H, coenzyme metabolism; I, lipid metabolism; D, cell division and chromosome partitioning; R, general functional prediction only; S, no functional prediction. COGs linked to cellular process and signaling include functional categories: D, N, M, Z, V, W, U, Y, O, T. COGs linked to information storage and processing include functional categories: B, A, L, K, J. COGs linked to metabolism include functional categories: E, G, H, C, P, I, F, Q. Poorly characterized functional categories are S and R.

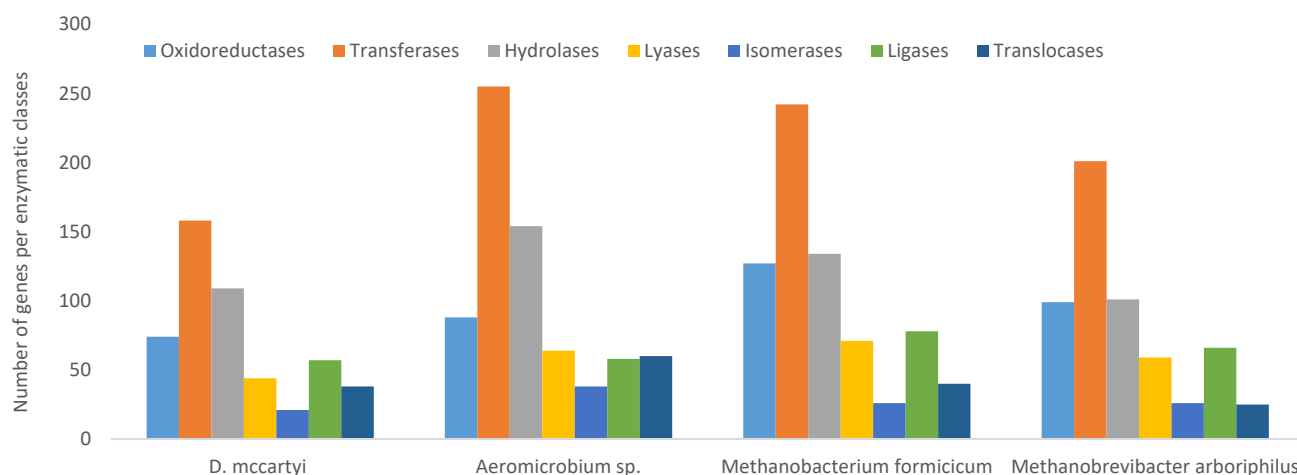

Figure S3. The number of genes annotated for each draft genome falling within oxidoreductases, transferases, hydrolases, lyases, isomerases, ligases, and translocases class enzymes.

### General features of annotated genome bins from the TCE/Cr(VI) biocathode

***Dehalococcoides mccartyi* (GenBank: JADIIK000000000).** The genome has been assembled in 23 contigs with an N50 of 0.2 Mb. The draft genome is quite complete (99% of completeness and absence of contamination) with a total length of 1.43 Mb and 49% of G+C content (Tab. S2). A comparison of the extracted *D. mccartyi* genome bin (Bin 1) with the *Dehalococcoides mccartyi* 195 (NCBI Reference Sequence: NC\_002936.3) and a *D. mccartyi* strain from an actively PCE-to-ethene dechlorinating culture containing  $\geq 80\%$  of *D. mccartyi* (GenBank: JAEMVJ000000000), returned average nucleotide identities of 97.64 % and 99.93 %, respectively. A total of 1499 predicted coding DNA sequences (CDSs) were annotated including 1471 CDSs with proteins (Tab. S3). Identified COGs mostly fell within functional categories linked to metabolism (52%), information storage and processing (24.2%), and cellular process and signaling (16.8%) (Tab. S4, Fig. S2). Within the annotated CDSs, those related to transferases, hydrolases, and oxidoreductases were the most abundant (Fig. S3).

***Methanobacterium formicicum* (GenBank: JADIIL000000000).** The genome was assembled in 40 contigs with a total length of 2.44 Mb (N50 = 0.1 Mb) and 41% of G+C content (Tab. S2). The draft genome was quite complete (99.2% of completeness and absence of contamination). In this genome, a total of 2043 genes were annotated including 2007 total CDSs of which 1999 were linked to proteins (Tab. S3). COGs identified mostly fell within functional categories linked to metabolism (50%), information storage and processing (31%), and cellular process and signaling (11%) (Tab. S4, Fig. S2).

The most abundant class of enzymes (ECs) were linked to transferases, hydrolases, and oxidoreductases (Fig. S3).

***Methanobrevibacter arboriphilus* (GenBank: JADIIN0000000000).** The genome has been assembled in 83 contigs with a total length of 2.34 Mb (N50 = 44031bp) and 26% of G+C content (Tab. S2). 2043 CDSs were annotated in the genome including 1999 genes coding for proteins identified (Tab. S3). Identified COGs mostly fell within metabolism (48%) and information storage and processing (35%) functional categories (Tab. S4, Fig. S2). The ECs distribution followed the similar pattern reported for *Methanobacterium formicicum* (Fig. S3).

***Aeromicrobium* sp. (GenBank: JADIIM0000000000).** The genome was assembled in 60 contigs with a total length of 2.07 Mb (N50 = 60655bp) and 68% of G+C content (Tab. S2). The draft genome has 94.6% of completeness and 1.74% of contamination. A total of 2058 CDSs were annotated, including 2001 CDSs coding for proteins identified (Tab. S3). Identified COGs mostly fell within functional categories linked to metabolism (50.5%), information storage and processing (21%), and cellular process and signaling (21%) (Tab S4, Fig. S2). The most abundant ECs were linked to transferases, hydrolases, and oxidoreductases (Fig. S3).
